# Supplementary material for: CD146 Associates with Gp130 to Control a Macrophage Pro‐inflammatory Program That Regulates the Metabolic Response to Obesity
Source: PubMed Central journal article supplement (PMC9069186; doi:10.1002/advs.202103719), 2022-03-08
Supplement: ADVS-9-2103719-s001.pdf [file ADVS-9-2103719-s001.pdf]

## Supporting Information

### CD146 Associates with Gp130 to Control a Macrophage Pro-inflammatory Program that Regulates the Metabolic Response to Obesity

Hongxia Duan<sup>\*</sup>, Lin Jing, Jianquan Xiang, Chenhui Ju, Zhenzhen Wu, Jingyu Liu, Xinran Ma, Xuehui Chen, Zheng Liu, Jing Feng, Xiyun Yan<sup>\*</sup>

## Supplementary Figures

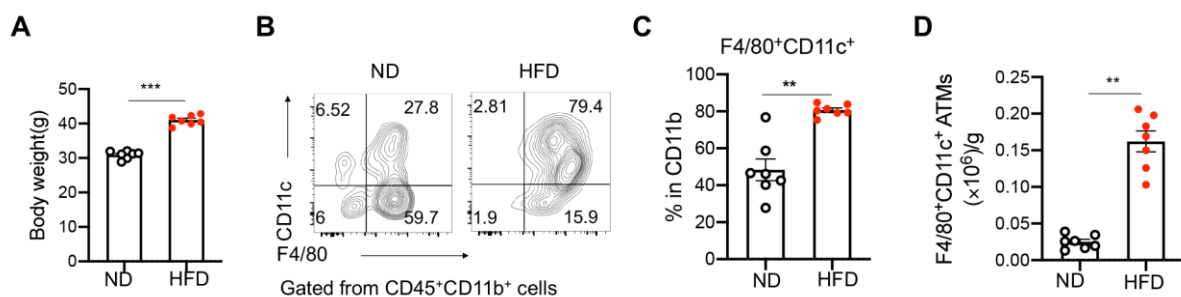

**Figure S1.** Accumulation of macrophages in adipose tissue after diet-induced obesity. A) Body weights of C57 mice fed with ND or HFD for 12 weeks (n = 7). B) Surface staining of F4/80 and CD11c on CD45<sup>+</sup>CD11b<sup>+</sup> cells from ND- or HFD-fed mice (representative of n = 3). The numbers in the outlined areas indicate the percentages for each gate. C, D) Percentages (C) and numbers (D) of CD11c<sup>+</sup>F4/80<sup>+</sup> cells in the CD11b<sup>+</sup> cells from ND and HFD mice (n = 7). Each symbol (A, C and D) represents an individual mouse; the short horizontal lines indicate the mean  $\pm$  SEM. For statistical significance, a two-tailed t-test (A, C, and D) was performed. \*\*p<0.01, \*\*\*p<0.001.

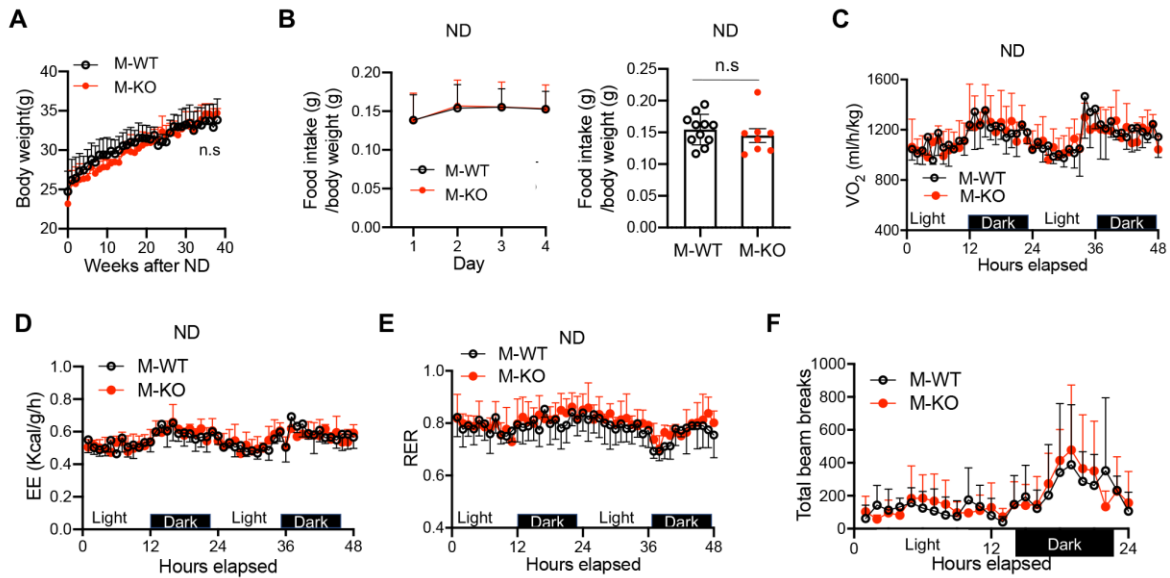

**Figure S2.** Macrophage CD146 does not affect the metabolism of ND mice. A) Weight gains of M-KO and M-WT mice fed with chow diet (ND) ( $n = 7$ ). B) Food intake analysis of ND mice ( $n = 11$  for M-WT or 8 for M-KO). C–E) Metabolic cage analysis of  $\text{VO}_2$ , energy expenditure and RER of ND mice ( $n = 5$ ). F) Physical activity of HFD mice ( $n = 5$ ). Each symbol (B) represents an individual mouse; the short horizontal lines indicate the mean  $\pm$  SEM. Two-way ANOVA with multiple-comparison test (A, B, C, D, E, and F) or two-tailed t-test (B) was performed to test statistical significance. ns, not significant.

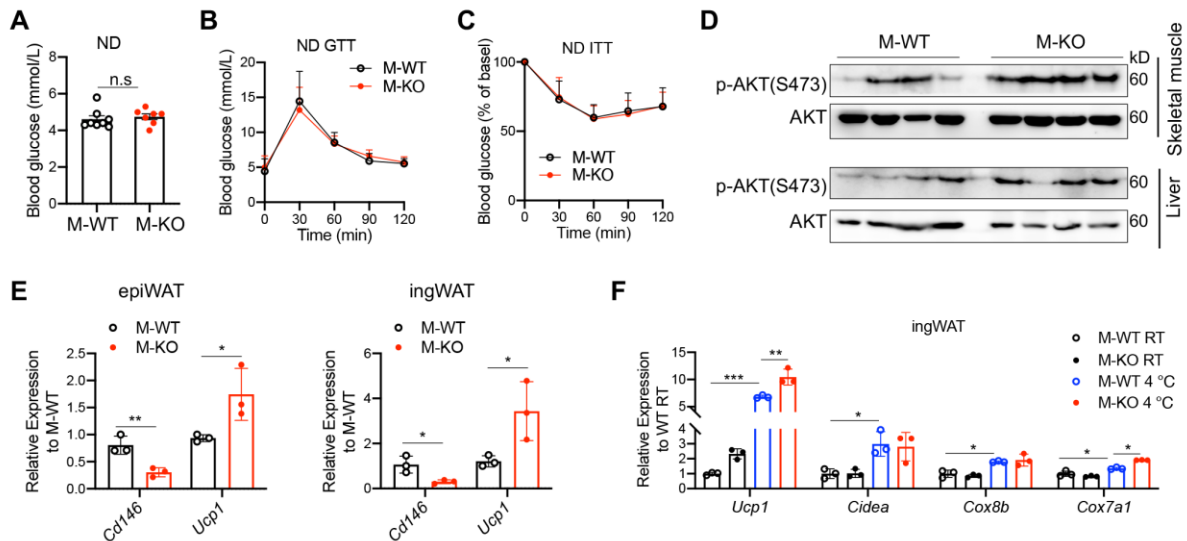

**Figure S3.** Deficiency of CD146 on macrophages improves insulin sensitivity. A-C) Fasting blood concentrations of glucose (A), GTT (B) and ITT (C) in M-WT and M-KO mice fed with a normal diet (ND) ( $n = 7$ ). D) Immunoblot analyses of skeletal muscle and liver tissue samples were performed using antibodies specific to Akt and phospho-Akt (pAKT-S473) (representative of  $n = 3$ ). E) Analysis of mRNA levels (*Ccl46* and *Ucp1*) from adipose tissue ( $n = 3$ ). F) Analysis of thermogenesis genes in ingWAT from mice kept at room temperature (RT) or 4°C for 72 h ( $n = 3$ ). Each symbol (A, E, and F) represents an individual mouse; the short horizontal lines indicate the mean  $\pm$  SEM (A,B and C) or SD (E and F). Two-tailed t-test (A) or 2-way ANOVA with multiple-comparison test (B and C) or one-way ANOVA (E and F) was performed to test statistical significance. n.s, not significant. \* $p < 0.05$ , \*\* $p < 0.01$ , \*\*\* $p < 0.001$ .

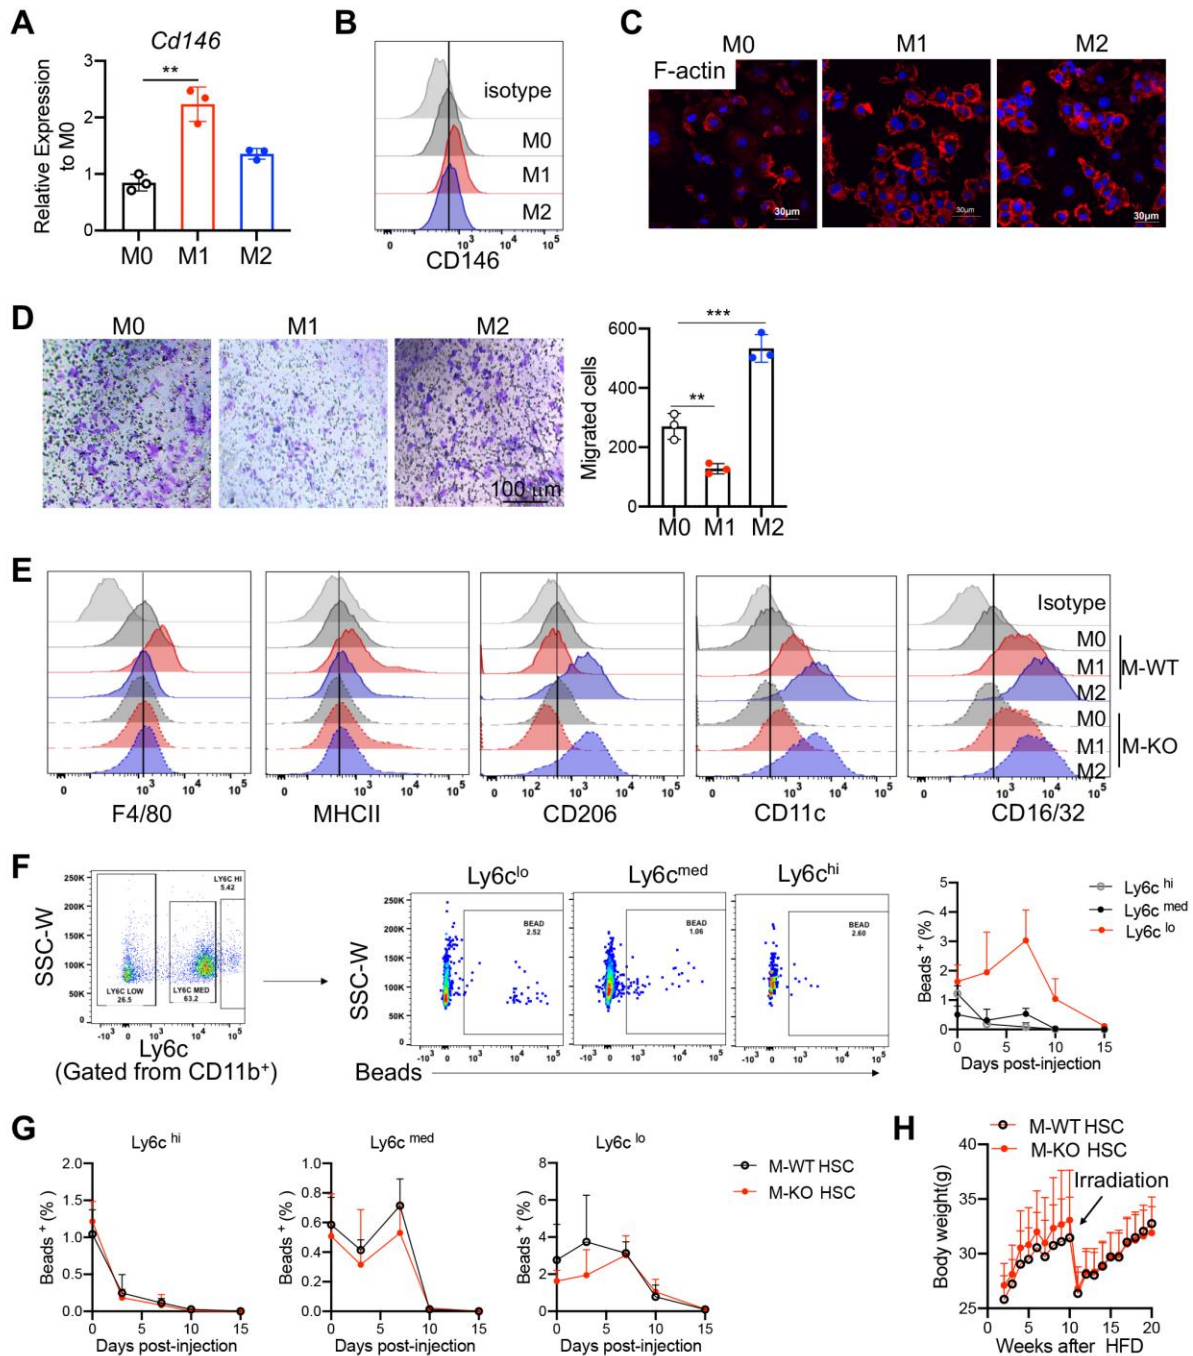

**Figure S4.** Macrophage deficiency of CD146 reduces macrophage retention in the adipose tissue. A) Relative CD146 gene expression in M0, M1 and M2 macrophages ( $n = 3$ ). B) Surface staining of CD146 on M0, M1 and M2 macrophages (representative of  $n = 3$ ). C) Immunofluorescence of F-actin (red) and nuclear (blue) staining in M0, M1 and M2 macrophages (representative of  $n = 3$ ). Scale bar, 30  $\mu\text{m}$ . D) Migrated M0, M1 and M2 macrophages in sera (representative of  $n = 3$ ). Scale bar, 100  $\mu\text{m}$ . E) Surface staining of F4/80, MHCII, CD206, CD11c and CD16/32 in M0, M1 and M2 cells induced from M-WT or M-KO BMDMs (representative of  $n = 3$ ). F) Dynamic change of percentages of bead-labeled myeloid cells in the blood in WT mice ( $n = 5$ ). G) Dynamic change of percentages of bead-labeled myeloid cells in the blood of M-WT HSC and M-KO HSC mice ( $n = 5$ ). H) Body weights of M-WT HSC and M-KO HSC mice ( $n = 5$ ). Each symbol (A, D) represents an individual experiment. The short horizontal lines indicate the mean  $\pm$  SD (A

and D) or SEM (F,G and H). One-way ANOVA (A, D) was performed to test statistical significance. \*\*p<0.01, \*\*\*p<0.001.

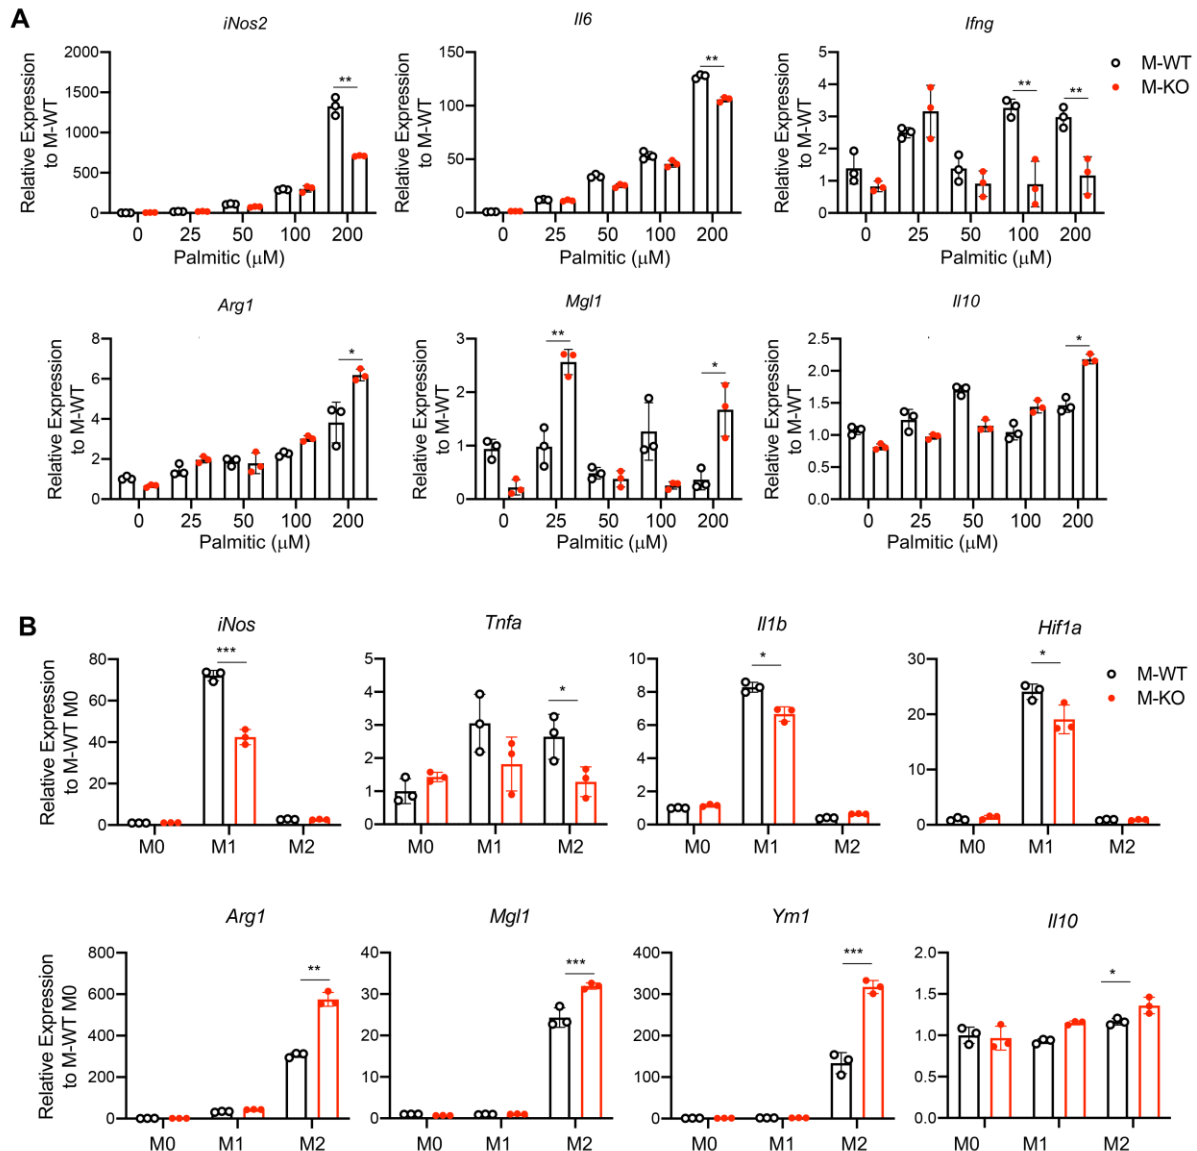

**Figure S5.** Macrophage deficiency of CD146 mitigates pro-inflammatory polarization. A) Relative gene expression in BMDMs after stimulation with the indicated concentrations of palmitic acid for 36 h (n = 3). B) Relative gene expression in M0, M1 and M2 induced from M-WT or M-KO BMDMs. Each symbol represents an individual experiment. The short horizontal lines indicate the mean  $\pm$  SD. One-way ANOVA (A and B) was performed to test statistical significance. \*p<0.05, \*\*p<0.01, \*\*\*p<0.001.

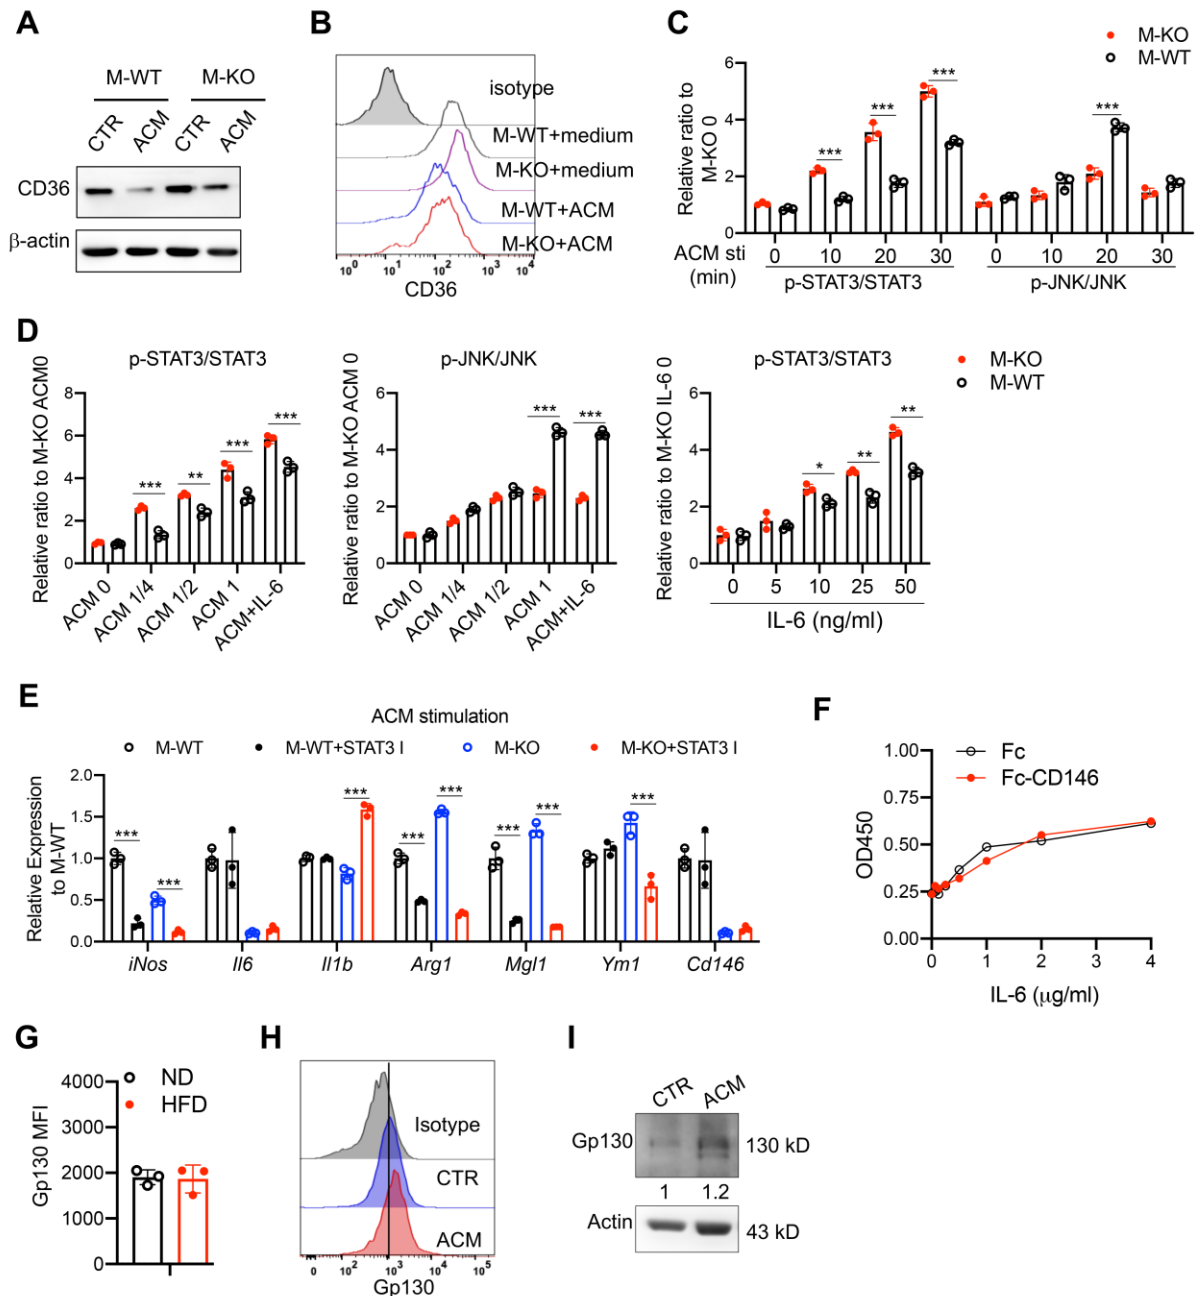

**Figure S6.** CD146 interacts with Gp130 and negatively regulates the STAT3 activation. A) Immunoblot analyses of BMDMs stimulated with ACM for 24 h using antibodies specific to CD36 (representative of  $n = 3$ ).  $\beta$ -actin served as a loading control. B) Cell surface staining of CD36 on BMDMs stimulated with or without ACM (representative of  $n = 3$ ). C) Quantitative analysis of the p-STAT3 / STAT3 ratio of macrophages under ACM stimuli for indicated time ( $n = 3$ ). D) Quantitative analysis of the ratio of p-STAT3/STAT3, p-JNK/JNK in macrophages under various stimuli ( $n = 3$ ). E) Relative gene expression in BMDMs after stimulation with ACM plus with or without STAT3 inhibitor for 24 h ( $n = 3$ ). F) Fc-CD146 or Fc protein was added to wells coated with different concentrations of human IL-6 recombinant protein, and ELISA was performed (representative of  $n = 3$ ). G) Gp130 expression on ATMs from ND- or HFD-fed mice ( $n = 3$ ). H) Surface staining of Gp130 on BMDMs stimulated with ACM or control medium (representative of  $n = 3$ ). I) Immunoblot analyses of Gp130 protein in BMDMs treated with ACM or control medium (representative of  $n = 3$ ). Actin was used as the loading control. Each symbol represents an individual

experiment (C, D, and E) or an individual mouse (G). The short horizontal lines indicate the mean  $\pm$  SD. One-way ANOVA (C, D, and E) was performed. \* $p < 0.05$ , \*\* $p < 0.01$ , \*\*\* $p < 0.001$ .

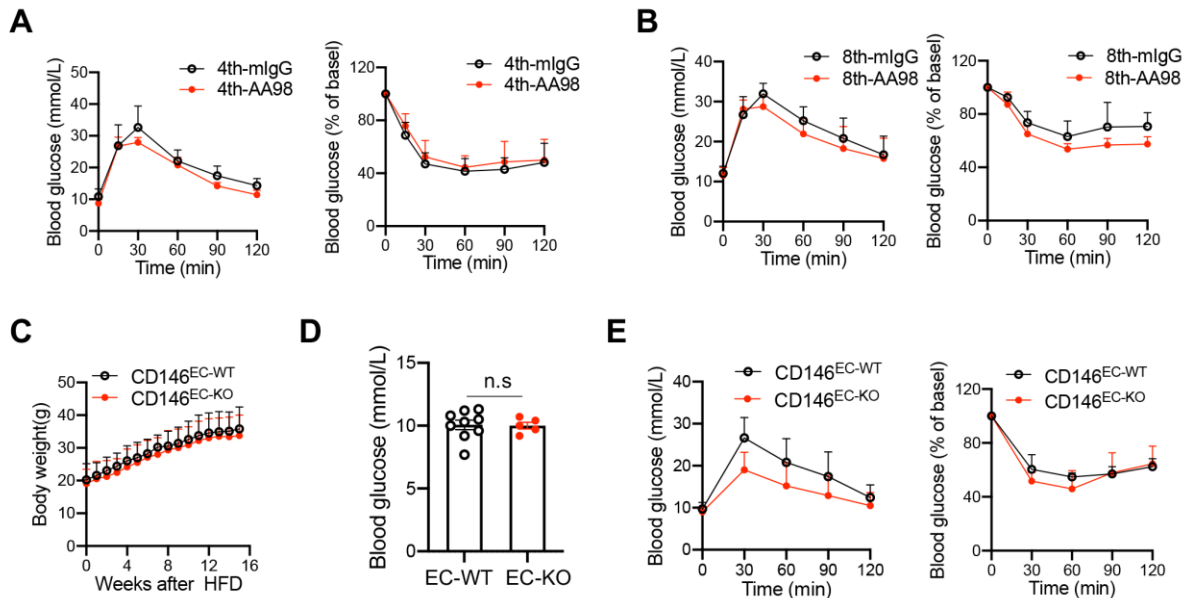

**Figure S7.** Targeting CD146 with functional antibody AA98 inhibits VAT inflammation in diet-induced obesity. A,B) GTT and ITT of HFD mice treated with antibody for four weeks (A) or eight weeks (B) ( $n = 7$ ). C) Body weights of HFD endothelial CD146 conditional knockout mice (CD146<sup>EC-KO</sup>,  $n = 5$ ) and their control mice (CD146<sup>EC-WT</sup>,  $n = 9$ ). D) Fasting blood glucose of HFD CD146<sup>EC-WT</sup> ( $n = 9$ ) and <sup>EC-KO</sup> mice ( $n = 5$ ). E) GTT and ITT of HFD CD146<sup>EC-WT</sup> ( $n = 9$ ) and <sup>EC-KO</sup> mice ( $n = 5$ ). Each symbol represents an individual mouse (D); the short horizontal lines indicate the mean  $\pm$  SEM. Two-way ANOVA with multiple-comparison test (A, B, C, and E) or two-tailed t-test (D) was performed. n.s., no significant difference.

## Supplementary Table

Table S1. Primers used in this study

| Gene Name      | Forward (5' to 3')     | Reverse (5' to 3')         |
|----------------|------------------------|----------------------------|
| <i>mCD146</i>  | AGTCCTCACACCAGAGCCAA   | CTCTTACGAGTCGGGGGCA        |
| <i>mMgl1</i>   | CAGAATCGCTTAGCCAATGTGG | TCCCAGTCCGTGTCCGAAC        |
| <i>mArg1</i>   | CCACAGTCTGGCAGTTGGAAG  | GGTTGTCAGGGGAGTGTGATG      |
| <i>miNos</i>   | GCGCTCTAGTGAAGCAAAGC   | GGCCTTGTGGTGAAGAGTGT       |
| <i>mIl10</i>   | GCTCCAAGACCAAGGTGTCT   | CGGAGAGAGGTACAAACGAGG      |
| <i>mIl1b</i>   | AACAGGCTGCTCTGGGATTC   | AGATTCGTAGCTGGATGCCG       |
| <i>mTnfa</i>   | CCCAGGGACCTCTCTAATCA   | AGCTGCCCCCAGCTTGAG         |
| <i>mIfng</i>   | ACGCTACACACTGCATCTTG   | GTCACCATCCTTTTGCCAGTTC     |
| <i>mIl6</i>    | GCCTTCTTGGGACTGATGCT   | CTGCAAGTGCATCATCGTTGT      |
| <i>mHif1a</i>  | CACCGATTCGCCATGGA      | TTTCTTTTCGACGTTTCAGAACTCAT |
| <i>mUcp1</i>   | CGTACCAAGCTGTGCGATGT   | GAAGCCACAAACCCTTTGAAAA     |
| <i>mRpl13a</i> | GAGGTCGGGTGGAAGTACCA   | TGCATCTTGGCCTTTTCT         |
| <i>mSocs3</i>  | TGAGCGTCAAGACCCAGTCG   | CACAGTCGAAGCGGGGAAC        |
| <i>mPias3</i>  | CGATGTCTCAAGATGGCGGA   | GGAAAGCGCCTGCGATAAAG       |
| <i>mGp130</i>  | TACCATGGAGCACCTCCCTT   | CACGAAAGAATACGAGCCCA       |
| <i>mCidea</i>  | TGACATTCATGGGATTGCAGAC | GGCCAGTTGTGATGACTAAGAC     |
| <i>mDio2</i>   | GAAGGCTGCCGAATGTCAAC   | GCGTGAGCAGTCTTGTGTTGG      |
| <i>mCox8b</i>  | TGTGGGGATCTCAGCCATAGT  | AGTGGGCTAAGACCCATCTG       |
| <i>mCox7a1</i> | CAGCGTCATGGTCAGTCTGT   | AGAAAACCGTGTGGCAGAGA       |
